# Supplementary material for: Field electron emission of layered Bi2Se3 nanosheets with atom-thick sharp edges
Source: Royal Society of Chemistry journal article supplement (doi:10.1039/c3nr06015b), 2014-01-01
Supplement: c3nr06015b1.pdf [file c3nr06015b1.pdf]

## Supporting Information

### Field Electron Emission of Layered $\text{Bi}_2\text{Se}_3$ Nanosheets with Atomic-Thick Sharp Edges

Huihui Huang, Yuan Li, Qi Li, Borui Li, Zengcai Song, Wenxiao Huang, Chujun Zhao, Han Zhang,\* Shuangchun Wen, David Carroll\* and Guojia Fang\*

#### Part 1. Fabrication routing and supplement characterizations

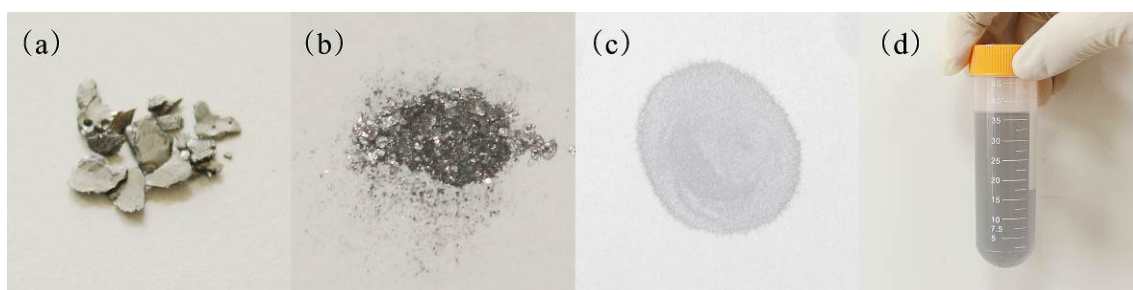

**Figure S1.** The fabrication routing of layered  $\text{Bi}_2\text{Se}_3$  nanosheets dispersion. (a) Bulk  $\text{Bi}_2\text{Se}_3$  crystals. (b)  $\text{Bi}_2\text{Se}_3$  powders. (c) Layered  $\text{Bi}_2\text{Se}_3$  nanosheet clusters. (d) Dispersion of layered  $\text{Bi}_2\text{Se}_3$  nanosheets.

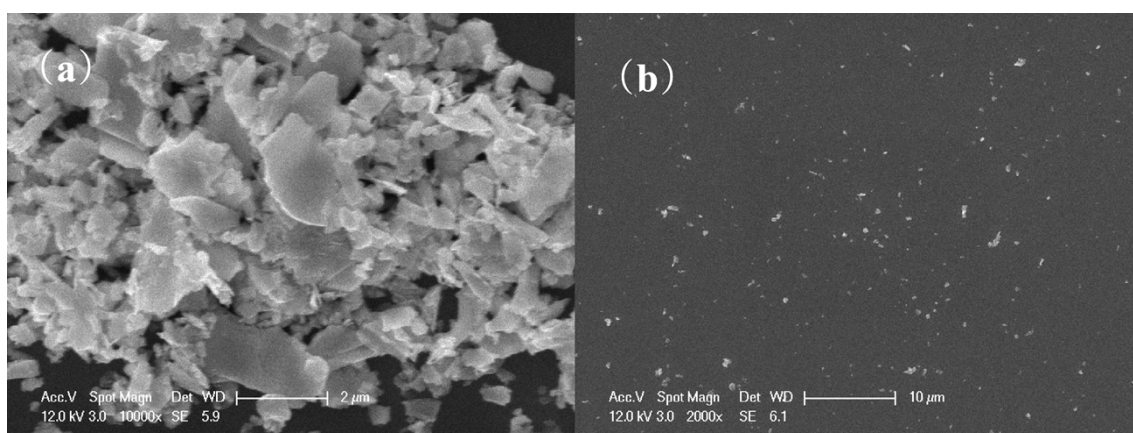

**Figure S2.** (a) SEM image of the layered  $\text{Bi}_2\text{Se}_3$  nanosheet clusters. It depicts the SEM image of the hydrothermal exfoliated  $\text{Bi}_2\text{Se}_3$  nanosheet clusters, which reveals that the hydrothermal intercalation and exfoliation method could turn the  $\text{Bi}_2\text{Se}_3$  from bulk-size to nano-size (see

optical images from **Figure S1(a) to (c)**). (b) SEM images of the exfoliated layered  $\text{Bi}_2\text{Se}_3$  nanosheets spin-coated on Si substrate at large scale.

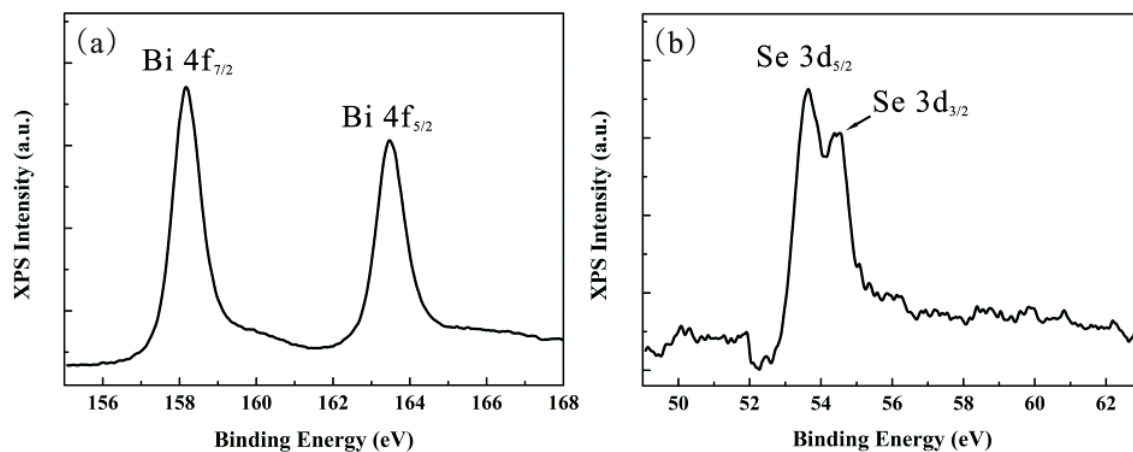

**Figure S3.** XPS spectra of  $\text{Bi}_2\text{Se}_3$ . (a) bismuth region ( $\text{Bi}4f$ ) and (b) selenium region ( $\text{Se}3d$ ).

Part 2. Field emission of carbon cloth decorated with layered  $\text{Bi}_2\text{Se}_3$  nanosheets.

The samples were directly fabricated by solution-casted on the pre-clean carbon cloth.

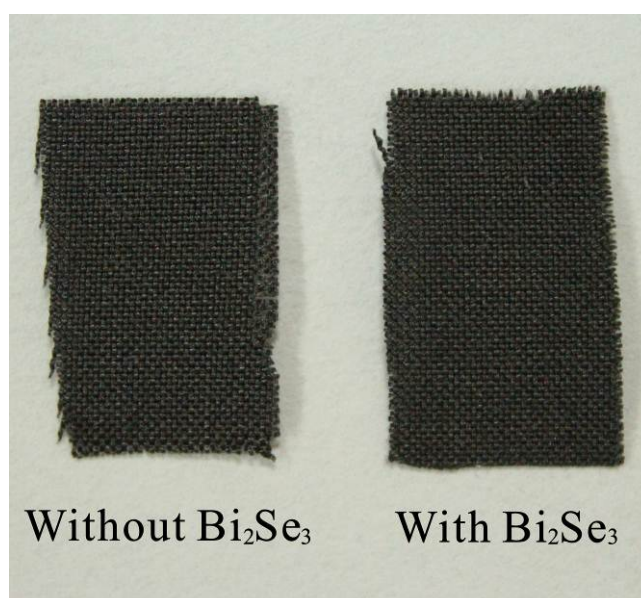

**Figure S4** Photograph of carbon cloth decorated without and with layered  $\text{Bi}_2\text{Se}_3$  nanosheets, which can't be distinguished by naked eyes.

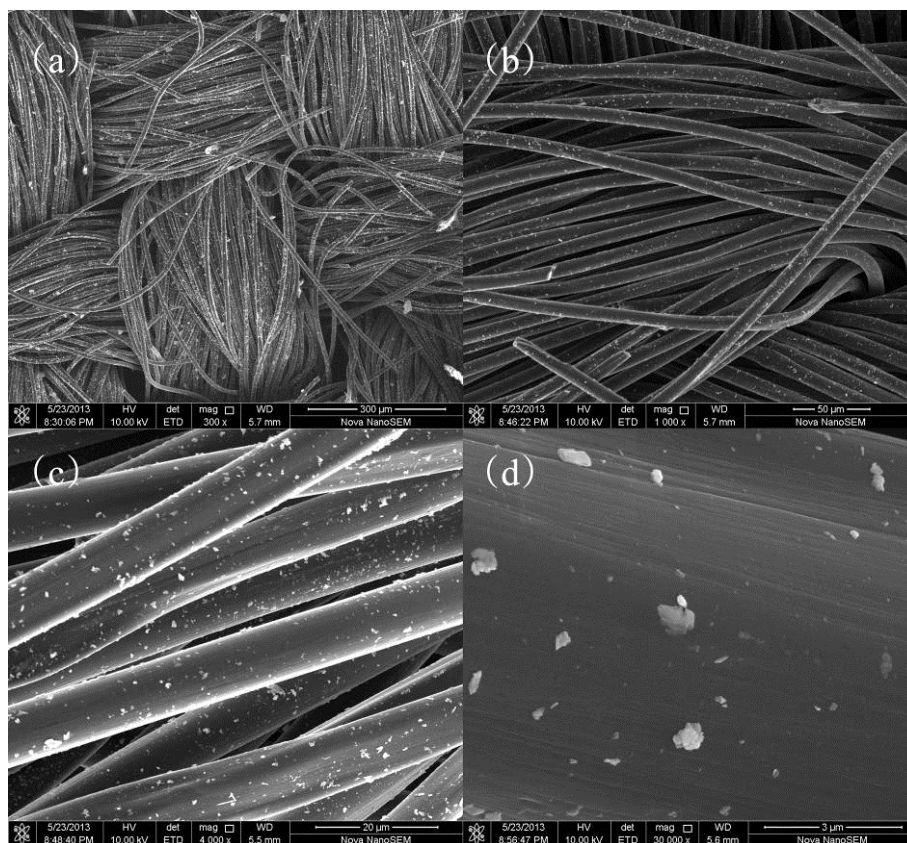

**Figure S5.** SEM images of carbon cloth decorated with layered  $\text{Bi}_2\text{Se}_3$  nanosheets.

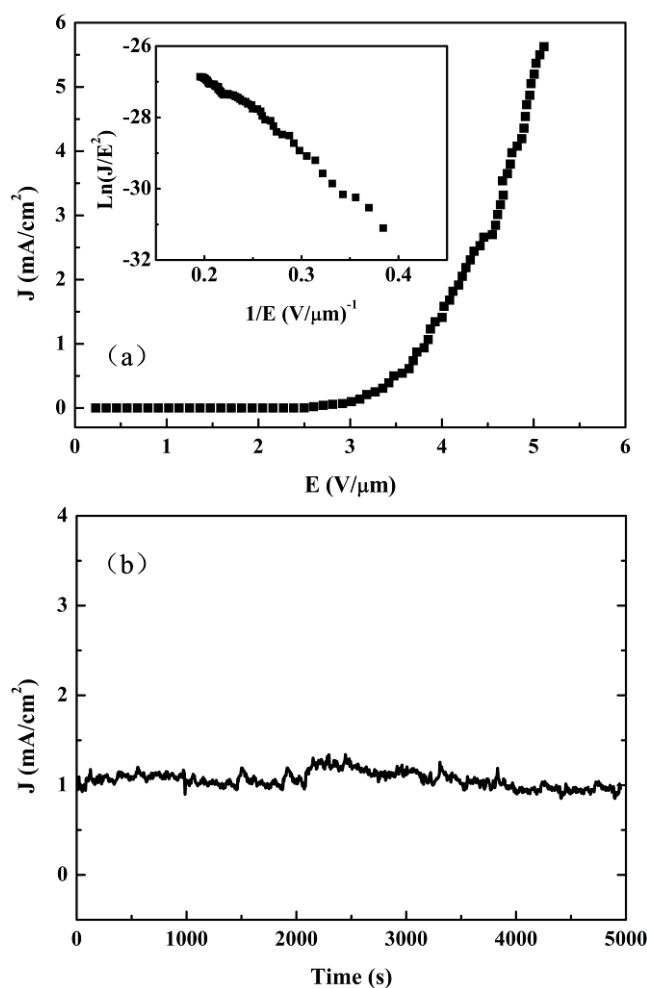

**Figure S6** (a) Typical plot of field emission current density versus electric field ( $J$ - $E$ ) of the layered Bi<sub>2</sub>Se<sub>3</sub> nanosheets on carbon cloth. Inset is the corresponding Fowler-Nordheim (FN) plot. (b) The field emission current stability over time.

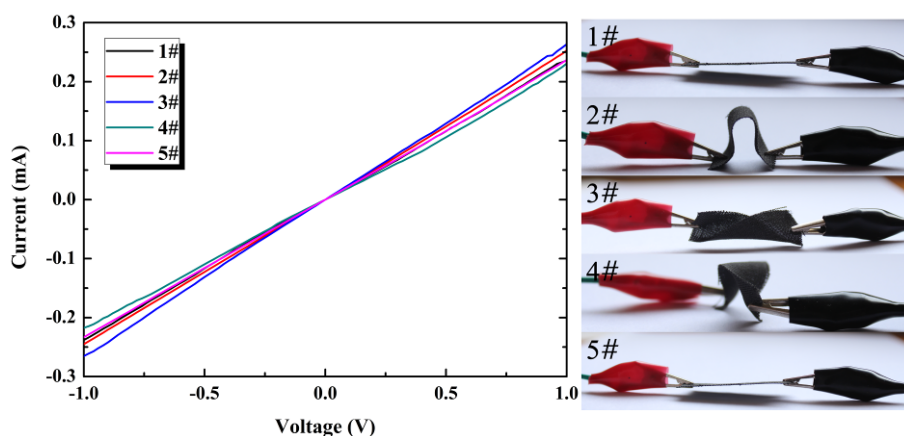

**Figure S7.** I-V curves of the sample under different bending conditions (1#-4#). 5# records the I-V curve of carbon fabric after 50 cycles of bending, which reveals the high flexibility and stability of the carbon cloth with layered Bi<sub>2</sub>Se<sub>3</sub> nanosheets on it.

### Part 3. Simulation and theoretical calculation

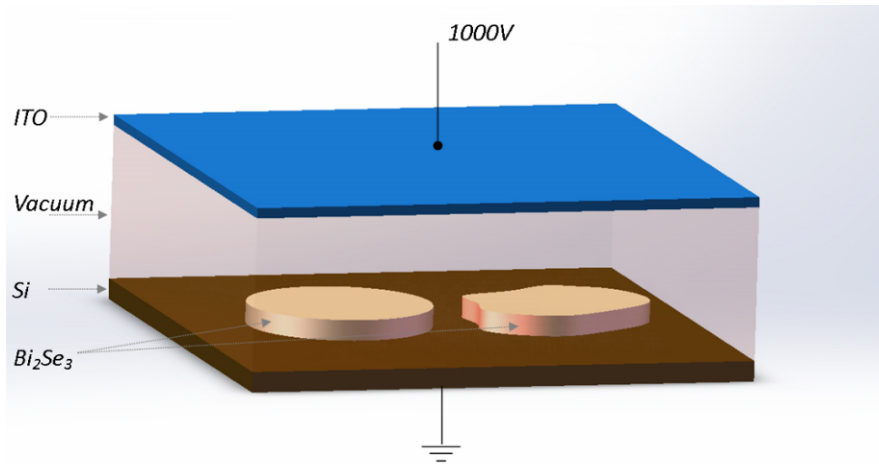

**Figure S8.** Schematic diagram of simulating electrical field distribution.

**Table S1.** Parameters of materials in simulation

|                                     | Thickness         | Permittivity |
|-------------------------------------|-------------------|--------------|
| <b>ITO</b>                          | 80 nm             | 7.6          |
| <b>Vacuum</b>                       | 220 $\mu\text{m}$ | 1.0          |
| <b>Si</b>                           | 400 $\mu\text{m}$ | 11.7         |
| <b>Bi<sub>2</sub>Se<sub>3</sub></b> | 5 nm              | 3.7          |

The permittivity of 5 QL ( $\sim 5$  nm) Bi<sub>2</sub>Se<sub>3</sub> was simulated from density functional theory. Our first principles electronic structure calculations were carried out in the projector augmented wave (PAW) framework parametrized by Perdew-Burke-Ernzerhof (PBE) of the generalized gradient approximation (GGA) [1] in the Vienna *ab initio* simulation package (VASP) [2,3]. Spin-orbit interactions (SOC) are turned on to capture the Dirac cone feature of the surface electronic states [4,5]. Fully relativistic PAW pseudo potentials acting on valence electron wave functions were used. The plane-wave kinetic energy cutoff is 400 eV and the self-consistency tolerance is  $1 \times 10^{-8}$  eV. The bulk material structure is relaxed until all force components are less than 0.001 eV/Å. The static dielectric response matrix was determined using density functional perturbation theory with local field effects. The method is explained

in Ref. [6]. One quintuple layer is defined as in Ref. [4] and the distance between slabs is 10 Å to avoid interlayer interactions. Based on these, the permittivity of 5 QL (~5 nm) Bi<sub>2</sub>Se<sub>3</sub> in z direction was calculated as ~3.7, which is shown in **Table S1**. More details of which will be shown in our coming work.

[1] J. P. Perdew, K. Burke, and M. Ernzerhof, Phys. Rev. Lett. 77, 3865 (1996).

[2] G. Kresse and J. Hafner, Phys. Rev. B 47, 558 (1993).

[3] G. Kresse and D. Joubert, Phys. Rev. B 59, 1758 (1999).

[4] H. Zhang, C. Liu, X. Qi, X. Dai, Z. Fang, and S. Zhang, Nat. Phys. 5, 438 (2009).

[5] O. V. Yazyev, J. E. Moore, and S. G. Louie, Phys. Rev. B 105, 266806 (2010).

[6] M. Gajdos, K. Hummer, G. Kresse, J. Furthmüller and F. Bechstedt, Phys. Rev. B 73, 045112 (2006).
